# Supplementary material for: The association between sleep latency and suboptimal self-rated health in medical students: a cross-sectional study
Source: PeerJ journal article supplement (doi:10.7717/peerj.19459), 2025-05-27
Supplement: Questionnaire.docx [file Questionnaire.docx]

**大学生日常活动与健康调查**

各位大学生：

你们好。生活行为习惯是影响健康的重要因素，为了解大学生日常活动习惯及其健康状况，促进其健康成长，特进行本调查。所有问题无对错之分，您的信息只用于科研，并被严格保密。你的回答对我们至关重要，请认真如实填写。谢谢配合。

温州医科大学生活方式与健康研究课题组

1. 你的年级 [单选题]

| ○大一 | ○大二 | ○大三 | ○大四 |
| --- | --- | --- | --- |
| ○大五 | ○研一 | ○研二 | ○研三 |

2. 你的生源地： [单选题]

| ○城市 | ○乡镇 | ○农村 |
| --- | --- | --- |

3. 你父母的文化程度（取较高文化者）： [单选题]

| ○小学及以下 |
| --- |
| ○初中 |
| ○高中或中专 |
| ○大学 |
| ○研究生及以上 |

4. 在过去的一个月里，你通常每晚实际睡眠多少个小时？（不等于卧床时间） [单选题]

| ○5小时或以下 | ○6 | ○7 | ○8 | ○9 | ○10 | ○11小时或以上 |
| --- | --- | --- | --- | --- | --- | --- |

5. 在过去的一个月里，你通常要多少分钟才能入睡？ [填空题]

_________________________________

请填写在过去一年里，你每天进行以下各项活动的情况。说明： ①填数字的地方可以精确到小数点后一位，例如0.5小时代表30分钟； ②请注意各个问题的单位是小时还是分钟； ③如果没有，请填0。

7. 你每天坐着的时间通常有几个小时： [填空题]

_________________________________

8. 你每天体力活动的时间通常有几个小时： [填空题]

_________________________________

9. 你是否有午睡习惯？ [单选题]

| ○是 | ○否 |
| --- | --- |

10. 你是否有吃夜宵习惯？ [单选题]

| ○是 | ○否 |
| --- | --- |

11. 人可以分为清晨型和夜晚型，你认为自己属于哪一种类型？ [单选题]

| ○清晨型（早睡早起型） |
| --- |
| ○清晨型多于夜晚型 |
| ○中间型 |
| ○夜晚型多于清晨型 |
| ○夜晚型（晚睡晚起型） |

12. 你是否吸烟（每天至少一支，连续六个月或以上）？ [单选题]

| ○没有 |
| --- |
| ○是，但已经戒了 |
| ○是，现在还吸 |

13. 你是否饮酒（每周至少3次，连续六个月或以上）？ [单选题]

| ○不饮酒 | ○是，但已经戒酒 | ○是，现在还饮酒 |  |  |  |  |  |
| --- | --- | --- | --- | --- | --- | --- | --- |

14. 与你的同龄人相比，从总体上说，你认为你的健康状况如何？[单选题]

| ○好 |
| --- |
| ○较好 |
| ○一般 |
| ○较差 |
| ○差 |

15. 你的身高为多少厘米？ [填空题]

_________________________________

16. 你目前的体重为多少公斤？ [填空题]

_________________________________

17. 你是否为独生子女？ [单选题]

| ○是 |
| --- |
| ○否 |

18. 你的性别： [单选题]

| ○男 | ○女 |  |  |  |  |  |  |
| --- | --- | --- | --- | --- | --- | --- | --- |

19. 你的年龄： [填空题]

_________________________________

20. 您的手机号码： [填空题]

_________________________________

21. 填表日期： [填空题]

_________________________________
